# Supplementary material for: Effect of potential on temperature-dependent SERS spectra of neuromedin B on Cu electrode
Source: Royal Society of Chemistry journal article supplement (doi:10.1039/c2cp42077e), 2012-11-16
Supplement: c2cp42077e.pdf [file c2cp42077e.pdf]

## Supplementary Information

### Effect of potential on temperature-dependent SERS spectra of neuromedin B on Cu electrode

*Ilja Ignatjev,<sup>a</sup> Edyta Proniewicz,\*<sup>b</sup> Leonard M. Proniewicz<sup>b</sup> and Gediminas Niaura\*<sup>a</sup>*

<sup>a</sup>Institute of Chemistry, Center for Physical Sciences and Technology, A. Gostauto 9, LT-01108, Vilnius, Lithuania

<sup>b</sup>Faculty of Chemistry, Jagiellonian University, ul. Ingardena 3, 30-060 Krakow, Poland

\*To whom correspondence should be addressed. E-mail: (G.N.) [gniaura@ktl.mii.lt](mailto:gniaura@ktl.mii.lt); (E.P.) [podstawk@chemia.uj.edu.pl](mailto:podstawk@chemia.uj.edu.pl).

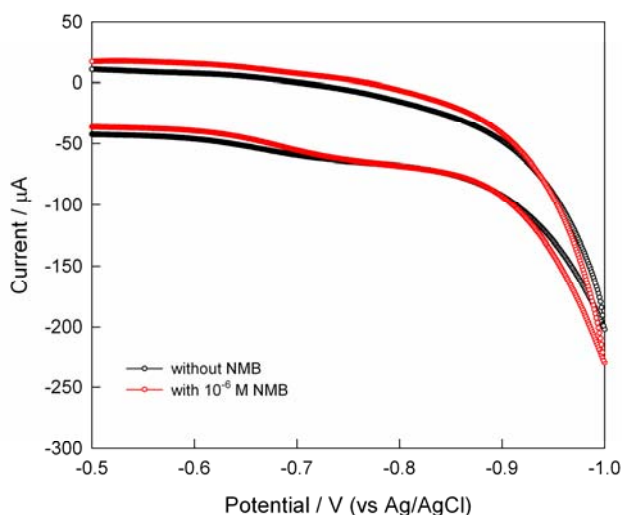

**Fig. S1.** Cyclic voltammograms of Cu electrode in 0.01 M phosphate buffer (pH 7.0) containing 0.1 M Na<sub>2</sub>SO<sub>4</sub> without peptide (black line) and in the presence of 10<sup>-5</sup> M NMB (red line). Potential sweep rate is 50 mV/s.

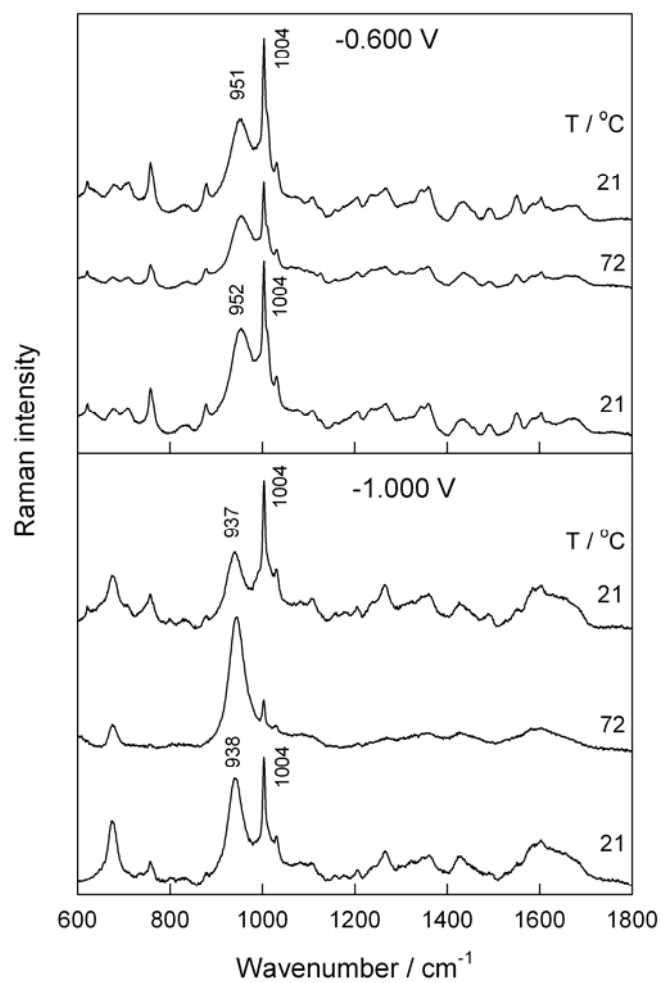

**Fig. S2.** Temperature-dependent reversibility of SERS spectra of adsorbed NMB ( $10^{-5}$  M) on Cu electrode at  $-0.600$  V and  $-1.000$  V potentials immersed in  $0.01$  M phosphate buffer (pH 7.0) containing  $0.1$  M  $\text{Na}_2\text{SO}_4$ . Upper curves show initial spectra.

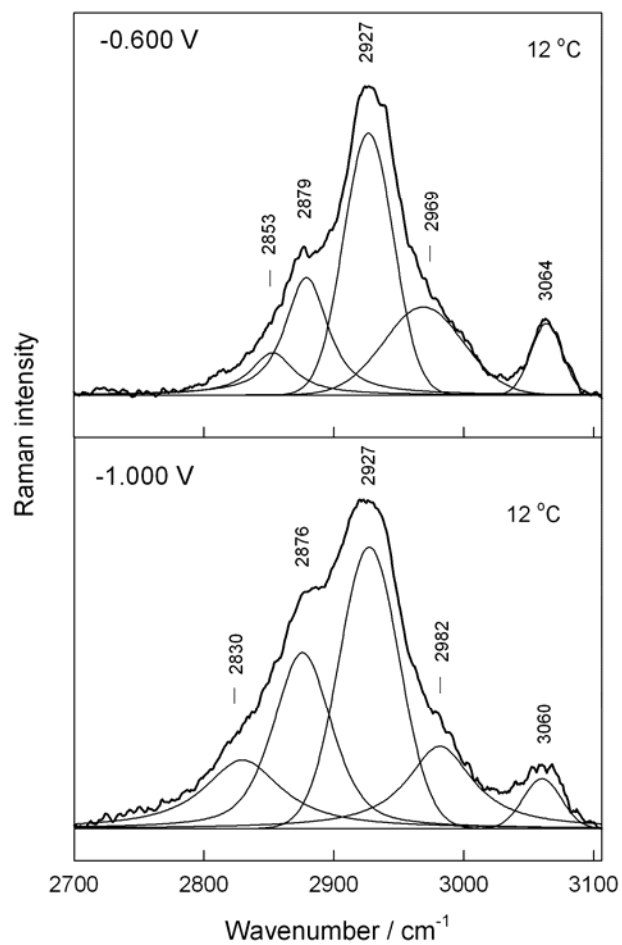

**Fig. S3.** SERS spectra of NMB adsorbed on Cu electrode at  $-0.600$  and  $-1.000$  V potentials in the  $2700\text{--}3106$   $\text{cm}^{-1}$  range with fitted Gaussian-Lorentzian line shapes.

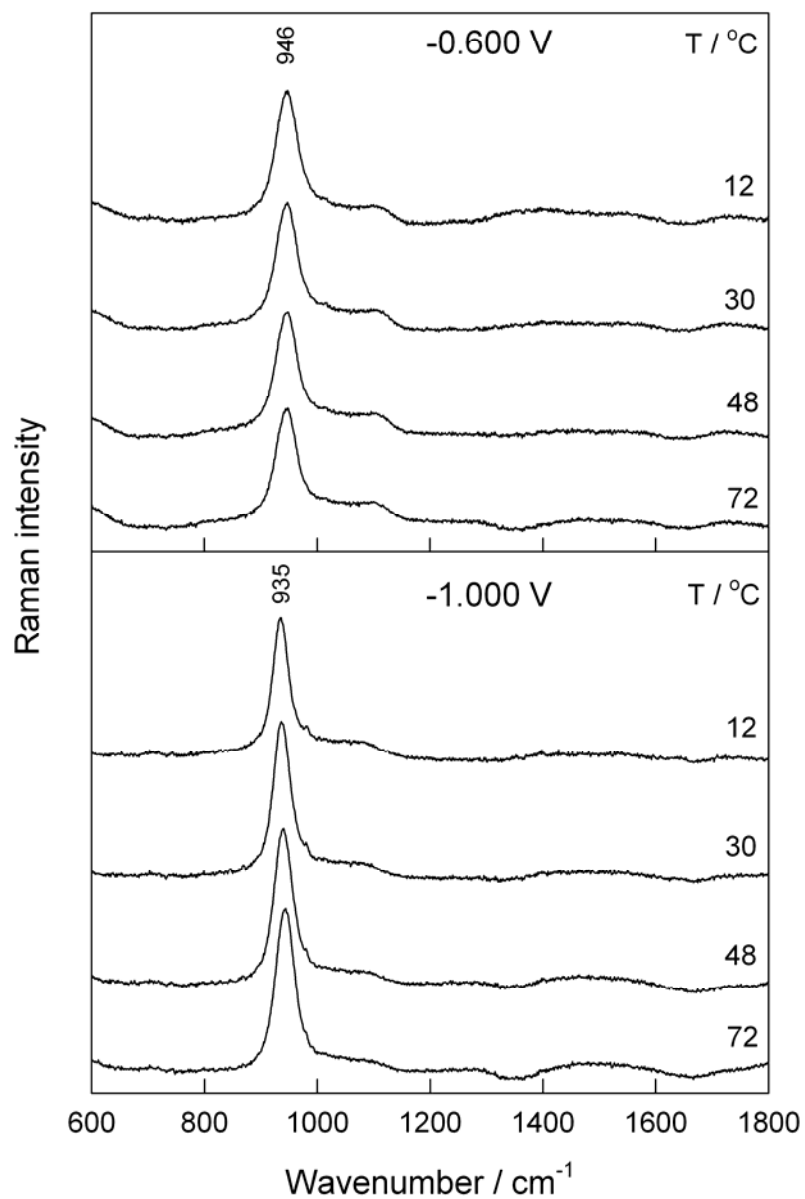

**Fig. S4.** Temperature dependence of SERS spectra of phosphate anions adsorbed on Cu electrode in the wavenumber region of  $600 - 1800\text{ cm}^{-1}$  at  $-600$  and  $-1.000\text{ V}$  electrode potentials. Measurements conditions:  $0.01\text{ M}$  phosphate buffer (pH 7.0) containing  $0.1\text{ M Na}_2\text{SO}_4$ ; excitation wavelength,  $785\text{ nm}$ ; laser power at the sample,  $30\text{ mW}$ ; integration time,  $300\text{ s}$ .

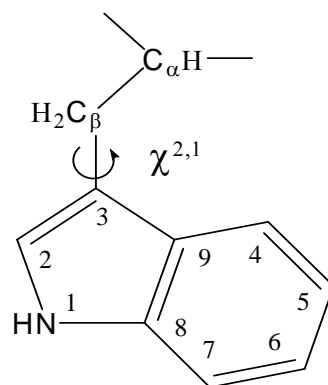

**Scheme S1.** Atom numbering scheme of the indole ring of Trp.
